# Supplementary material for: Factors Associated with a Lack of Willingness to Vaccinate against COVID-19 in Poland: A 2021 Nationwide Cross-Sectional Survey
Source: MDPI journal article supplement (doi:10.3390/vaccines9091000), 2021-09-08
Supplement: s1 [file s1]

**Supplementary Figure S1. Translated version of the study questionnaire**

| <b>Questions</b>                                                                                                             | <b>Answers</b>                                                                                                                                                                                                                                                                                                                                                                                                                                                                                                                                                                                                                                                                                                                                   |
|------------------------------------------------------------------------------------------------------------------------------|--------------------------------------------------------------------------------------------------------------------------------------------------------------------------------------------------------------------------------------------------------------------------------------------------------------------------------------------------------------------------------------------------------------------------------------------------------------------------------------------------------------------------------------------------------------------------------------------------------------------------------------------------------------------------------------------------------------------------------------------------|
| <b>Year of birth of the respondent</b>                                                                                       | <ul style="list-style-type: none"> <li>• Numeric</li> </ul>                                                                                                                                                                                                                                                                                                                                                                                                                                                                                                                                                                                                                                                                                      |
| <b>Sex of the respondent</b>                                                                                                 | <ul style="list-style-type: none"> <li>• Male</li> <li>• Female</li> </ul>                                                                                                                                                                                                                                                                                                                                                                                                                                                                                                                                                                                                                                                                       |
| <b>Place of residence</b>                                                                                                    | <ul style="list-style-type: none"> <li>• Please declare</li> </ul>                                                                                                                                                                                                                                                                                                                                                                                                                                                                                                                                                                                                                                                                               |
| <b>M1. Do you currently work for profit (full-time, in your own company or farm, or do you undertake commissioned work)?</b> | <ul style="list-style-type: none"> <li>• Yes, part-time</li> <li>• Yes, full time</li> <li>• Yes, casual</li> <li>• Not</li> </ul>                                                                                                                                                                                                                                                                                                                                                                                                                                                                                                                                                                                                               |
| <b>M4. What is your education? Please provide the highest level of education achieved by you.</b>                            | <ul style="list-style-type: none"> <li>• Incomplete primary or no school education</li> <li>• Primary</li> <li>• Junior high school</li> <li>• Basic Vocational (also SPR)</li> <li>• Secondary general education without the matura exam</li> <li>• Secondary general education with high school diploma</li> <li>• Secondary vocational without high school diploma</li> <li>• Secondary vocational with high school diploma (technical high school, vocational or technical high school)</li> <li>• Post-secondary or post-secondary</li> <li>• Higher with the title of engineer, bachelor, certified economist</li> <li>• Higher with a master's degree, doctor or equivalent</li> <li>• Higher with a doctoral degree or higher</li> </ul> |
| <b>M5. How many people, including yourself, does your household consist of?</b>                                              | <ul style="list-style-type: none"> <li>• Numeric</li> </ul>                                                                                                                                                                                                                                                                                                                                                                                                                                                                                                                                                                                                                                                                                      |
| <b>M6. How many adults, i.e. those aged 18 or over, make up your household? Please include yourself as well.</b>             | <ul style="list-style-type: none"> <li>• Numeric</li> </ul>                                                                                                                                                                                                                                                                                                                                                                                                                                                                                                                                                                                                                                                                                      |
| <b>9. If the elections to the Sejm and Senate were held next Sunday, would you take part in them?</b>                        | <ul style="list-style-type: none"> <li>• I would definitely take part in them</li> <li>• I don't know if I would take part in them</li> <li>• I certainly would not take part in them</li> <li>• Refusal to answer</li> </ul>                                                                                                                                                                                                                                                                                                                                                                                                                                                                                                                    |

|                                                                                         |                                                                                                                                                                                                                                                                                                                                                                                                                                                                                                                                                                                                                                             |
|-----------------------------------------------------------------------------------------|---------------------------------------------------------------------------------------------------------------------------------------------------------------------------------------------------------------------------------------------------------------------------------------------------------------------------------------------------------------------------------------------------------------------------------------------------------------------------------------------------------------------------------------------------------------------------------------------------------------------------------------------|
| <b>10. Which party of the party would you vote for in the parliamentary elections?</b>  | <ul style="list-style-type: none"> <li>• Prawo i Sprawiedliwość (wraz z Solidarną Polską i Porozumieniem)</li> <li>• Koalicja Obywatelska (Platforma Obywatelska, Nowoczesna, Inicjatywa Polska, Zieloni)</li> <li>• Lewica (Nowa Lewica (dawniej SLD), Wiosna, Lewica Razem)</li> <li>• Konfederacja Wolność i Niepodległość (KORWiN, Ruch Narodowy, Braun)</li> <li>• Polskie Stronnictwo Ludowe - Koalicja Polska (Polskie Stronnictwo Ludowe, UED)</li> <li>• Polska 2050 Szymona Hołowni</li> <li>• Kukiz '15</li> <li>• other party</li> <li>• It's hard to say, I don't know yet, I hesitate</li> <li>• Refusal to answer</li> </ul> |
| <b>24. Are you personally afraid of coronavirus infection?</b>                          | <ul style="list-style-type: none"> <li>• I am afraid</li> <li>• Yes, I'm a little scared</li> <li>• No, I'm not afraid</li> <li>• No, I'm not afraid at all</li> <li>• Hard to say</li> <li>• Refusal to answer</li> </ul>                                                                                                                                                                                                                                                                                                                                                                                                                  |
| <b>25. Would you like to get vaccinated against COVID-19?</b>                           | <ul style="list-style-type: none"> <li>• Definitely yes</li> <li>• Probably yes</li> <li>• Probably not</li> <li>• Definitely not</li> <li>• I am already vaccinated</li> <li>• Hard to say</li> <li>• Refusal to answer</li> </ul>                                                                                                                                                                                                                                                                                                                                                                                                         |
| <b>26. Why would you not want to be vaccinated against COVID-19?</b>                    | <ul style="list-style-type: none"> <li>• I am concerned about the side effects of the COVID-19 vaccine</li> <li>• I am concerned that the COVID-19 vaccine will not be effective</li> <li>• I avoid vaccinations at all</li> <li>• I have already had COVID-19</li> <li>• I believe that COVID-19 is not a serious disease</li> <li>• Other reasons</li> </ul>                                                                                                                                                                                                                                                                              |
| <b>27. For what other reasons would you not want to be vaccinated against COVID-19?</b> | Text                                                                                                                                                                                                                                                                                                                                                                                                                                                                                                                                                                                                                                        |

|                                                                                                              |                                                                                                                                                                                                                                                                                            |
|--------------------------------------------------------------------------------------------------------------|--------------------------------------------------------------------------------------------------------------------------------------------------------------------------------------------------------------------------------------------------------------------------------------------|
| <p><b>M7. Do you take part in religious practices such as: masses, services or religious meetings?</b></p>   | <ul style="list-style-type: none"> <li>• Yes, usually a couple of times a week</li> <li>• Yes, once a week</li> <li>• Yes, approximately once or twice a month</li> <li>• Yes, several times a year</li> <li>• I do not participate in them at all</li> <li>• Refusal to answer</li> </ul> |
| <p><b>M10. Do you use the Internet (websites, e-mail, instant messaging, etc.) at least once a week?</b></p> | <ul style="list-style-type: none"> <li>• Yes</li> <li>• No</li> <li>• Refusal to answer</li> </ul>                                                                                                                                                                                         |
